# Supplementary material
Source: Springer Nature journal article supplement (https://www.springermedizin.de/resource/supplementary/13058_2013_3568_MOESM7_ESM.pdf/9703656)
Supplement: MOESM7 [file 9703656]

|                    |             | Estrogen Receptor only |                        |       | Progesterone Receptor only |                        |       | Estrogen Receptor and Progesterone Receptor |                     |       |
|--------------------|-------------|------------------------|------------------------|-------|----------------------------|------------------------|-------|---------------------------------------------|---------------------|-------|
| Cohort             | Receptor    | n (events)             | OR (95% CI)            | p     | n (events)                 | OR (95% CI)            | p     | n (events)                                  | OR (95% CI)         | p     |
| GEM Dataset (IHC)  | ER          | 465 (165)              | 0.67<br>(0.48 to 0.93) | 0.02  | 465 (165)                  |                        |       | 465 (165)                                   | 0.74 (0.51 to 1.07) | 0.11  |
|                    | PR          |                        |                        |       |                            | 0.71<br>(0.52 to 0.96) | 0.03  |                                             | 0.80 (0.57 to 1.13) | 0.21  |
| GEM Dataset (mRNA) | <i>ESR1</i> | 975 (299)              | 0.81<br>(0.72 to 0.91) | <.001 | 975 (299)                  |                        |       | 975 (299)                                   | 0.83 (0.73 to 0.95) | 0.008 |
|                    | <i>PGR</i>  |                        |                        |       |                            | 0.85<br>(0.75 to 0.96) | 0.009 |                                             | 0.93 (0.81 to 1.07) | 0.31  |
| NHS (TMA)          | ER          | 2,272(486)             | 0.76<br>(0.61 to 0.96) | 0.02  | 2,287 (487)                |                        |       | 2,218 (482)                                 | 0.85 (0.64 to 1.13) | 0.25  |
|                    | PR          |                        |                        |       |                            | 0.78<br>(0.64 to 0.94) | 0.01  |                                             | 0.86 (0.67 to 1.11) | 0.25  |
